# Supplementary material
Source: PubMed Central journal article supplement (PMC5948105)
Supplement: NIHMS922001-supplement.pdf [file NIHMS922001-supplement.pdf]

## Supplemental Figures

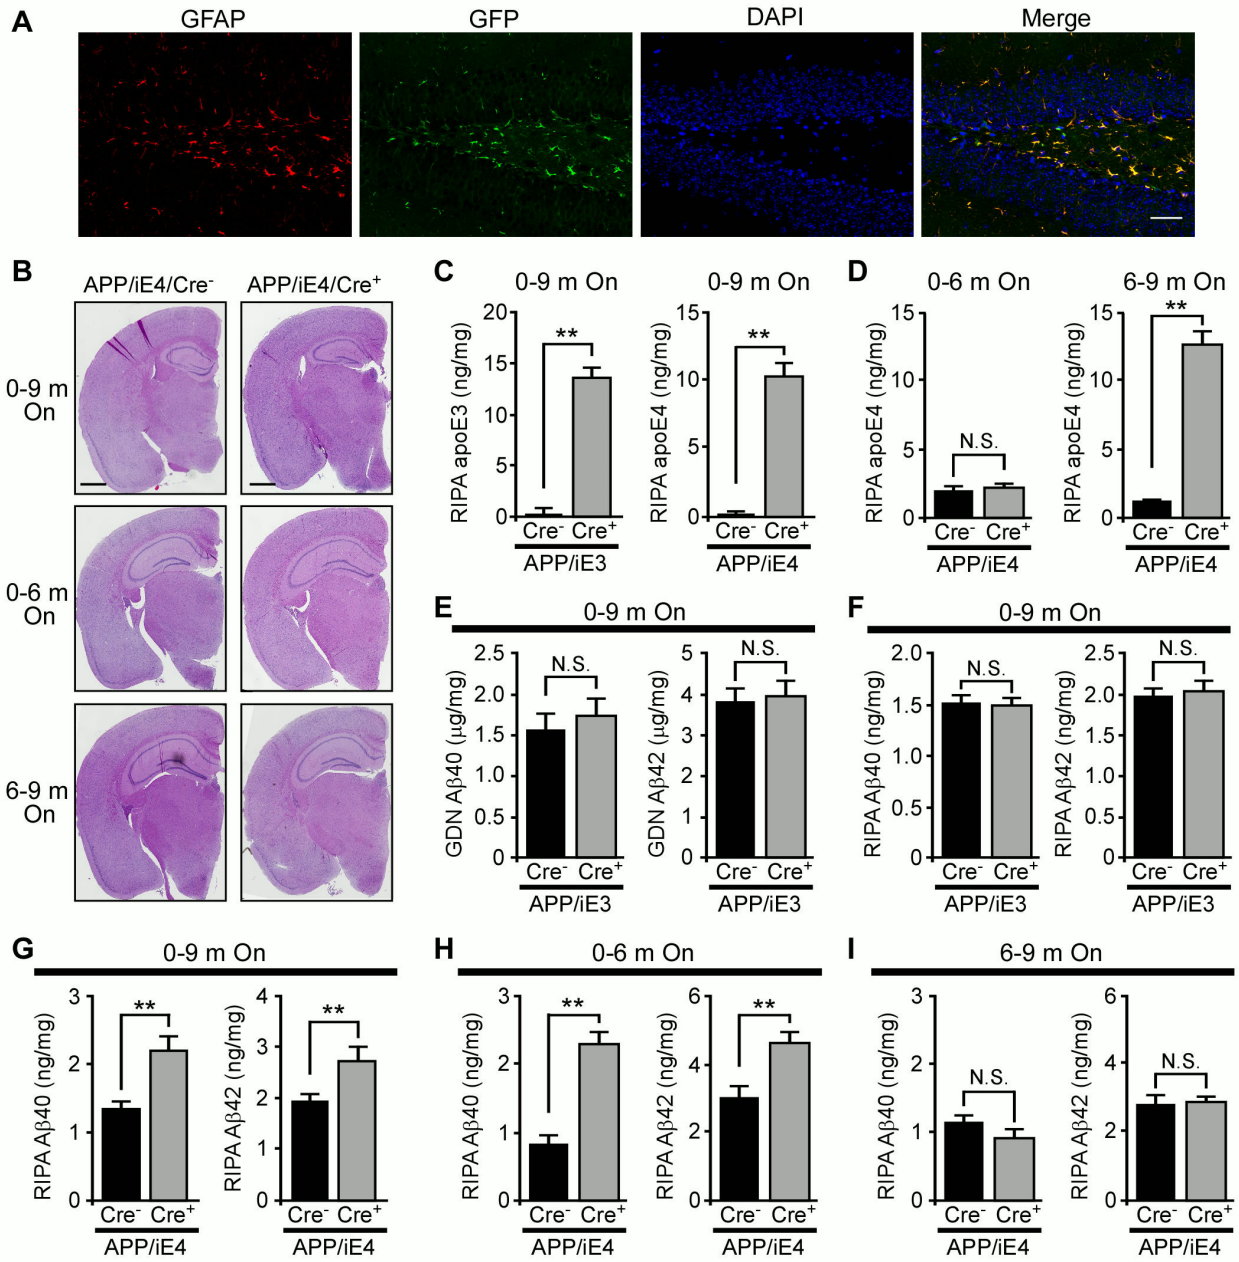

**Figure S1. Expression of Astrocytic ApoE4 during the Amyloid Seeding Stage Increases the Levels of Soluble A $\beta$ . Related to Figure 1 and 2.**

(A) Subgranular zone in the hippocampus from apoE3 inducible (Cre<sup>+</sup>) amyloid model mice were co-immunostained for astrocyte-specific marker (anti-GFAP; red) and GFP which represents apoE distribution (green). Scale bar, 50  $\mu$ m.

(B) H&E staining of brain sections of APP/PS1 mice expressing apoE4 throughout the entire 9 months (0-9 m On), during 0-6 months (0-6 m On) or during 6-9 months (6-9 m On) (n=8-10/group) are shown. Scale bar, 1 mm.

(C) The cortical brain tissues of mice at 9 months of age were fractionated into RIPA-soluble and -insoluble (guanidine-HCl, GDN) fractions. RIPA-soluble apoE levels in APP/PS1 mice expressing apoE3 (APP/iE3; n=16-18/group) or apoE4 (APP/iE4; n=13-16/group) in the astrocytes throughout the entire 9 months (0-9 m On) were examined by ELISA. Data represent mean  $\pm$  SEM. \*\*, p<0.01.

(D) RIPA-soluble apoE in the cortex of APP/PS1 mice expressing apoE4 during 0-6 months (0-6 m On; n=6-8/group) or during 6-9 months (6-9 m On; n=8-10/group) were examined by ELISA. Data represent mean  $\pm$  SEM. \*\*, p<0.01; N.S., not significant.

(E, F) RIPA-soluble and -insoluble A $\beta$ 40 and A $\beta$ 42 in the cortex of 9-month-old APP/PS1 mice expressing apoE3 (APP/iE3; n=17-18/group) throughout the entire 9 months (0-9 m On) were examined by specific A $\beta$  ELISA. Data represent mean  $\pm$  SEM. N.S., not significant.

(G-I) Soluble A $\beta$ 40 and A $\beta$ 42 levels in the cortex of APP/PS1 mice expressing apoE4 (APP/iE4) throughout the entire 9 months (0-9 m On; n=13-16/group), during 0-6 months (0-6 m On; n=6-8/group) or during 6-9 months (6-9 m On; n=7-9/group) were examined by specific A $\beta$  ELISA. Data represent mean  $\pm$  SEM. \*\*, p<0.01; N.S., not significant.

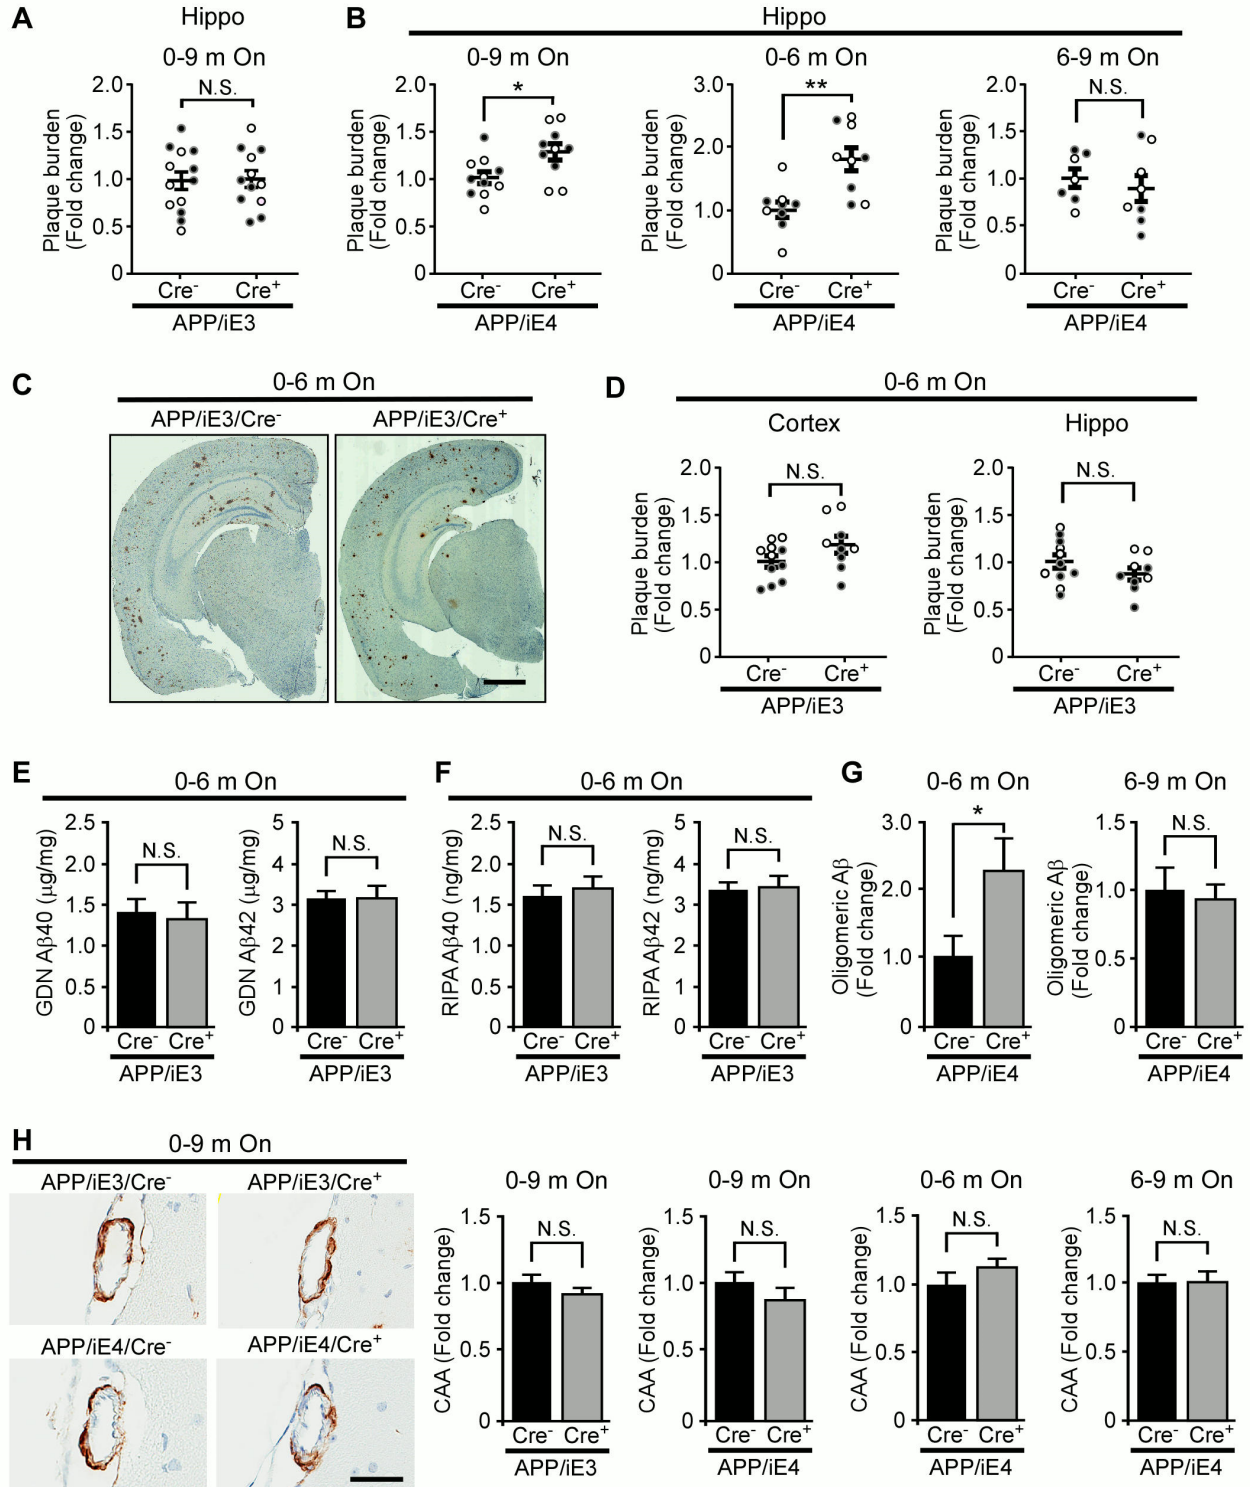

**Figure S2. Effects of Astrocytic ApoE Expression on Amyloid Pathology and Cerebral Amyloid Angiopathy (CAA) Formation. Related to Figure 2.**

(A, B) Brain sections from APP/PS1 mice expressing apoE3 (APP/iE3; n=12-13/group), or apoE4 (APP/iE4; n=10-11/group) throughout entire 9 months, during 0-6 months (n=9/group) or 6-9 months (n=7-8/group) were immunostained with a pan-A $\beta$  antibody. The plaque burden in the hippocampus was normalized to that of APP/PS1 mice. Open circles are females and closed circles are males. Data represent mean  $\pm$  SEM. \*, p<0.05; \*\*, p<0.01; N.S., not significant.

(C, D) Brain sections from 9-month-old APP/PS1 mice expressing apoE3 (APP/iE3) during seeding stage (0-6 m On; n=9-11/group) were immunostained with a pan-A $\beta$  antibody. The plaque burden in the cortex and hippocampus was quantified and normalized to that of APP/PS1 mice. Data represent mean  $\pm$  SEM. N.S., not significant.

(E, F) The levels of A $\beta$ 40 and A $\beta$ 42 in RIPA fraction and guanidine (GDN) fraction in the cortex of APP/PS1 mice expressing apoE3 during seeding stage (0-6 m On; n=9-11/group) were examined by specific A $\beta$  ELISA. Data represent mean  $\pm$  SEM. N.S., not significant.

(G) The levels of A $\beta$  oligomers in the cortex of APP/PS1 mice expressing apoE4 during seeding stage (0-6 m On; n=8-9/group) or rapid growing period (6-9 m On; n=8/group) were examined by oligomeric A $\beta$  ELISA. Data represent mean  $\pm$  SEM. \*, p<0.05; N.S., not significant.

(H) The representative images of leptomeningeal CAA are shown. Scale bar, 50  $\mu$ m. Quantification of amyloid deposition in cerebrovasculature of 9-month-old APP/PS1 mice expressing apoE3 for the entire 9 months (0-9 m On; n=11-12/group), or apoE4 for 9 months (0-9 m On; n=13/group), during seeding stage (0-6 m On; n=7-8/group) or rapid growing period (6-9 m On; n=7-8/group). The burden of CAA in leptomeningeal arteries (13-15 arteries/mouse) was normalized to that of APP/PS1 mice. Data represent mean  $\pm$  SEM. N.S., not significant.

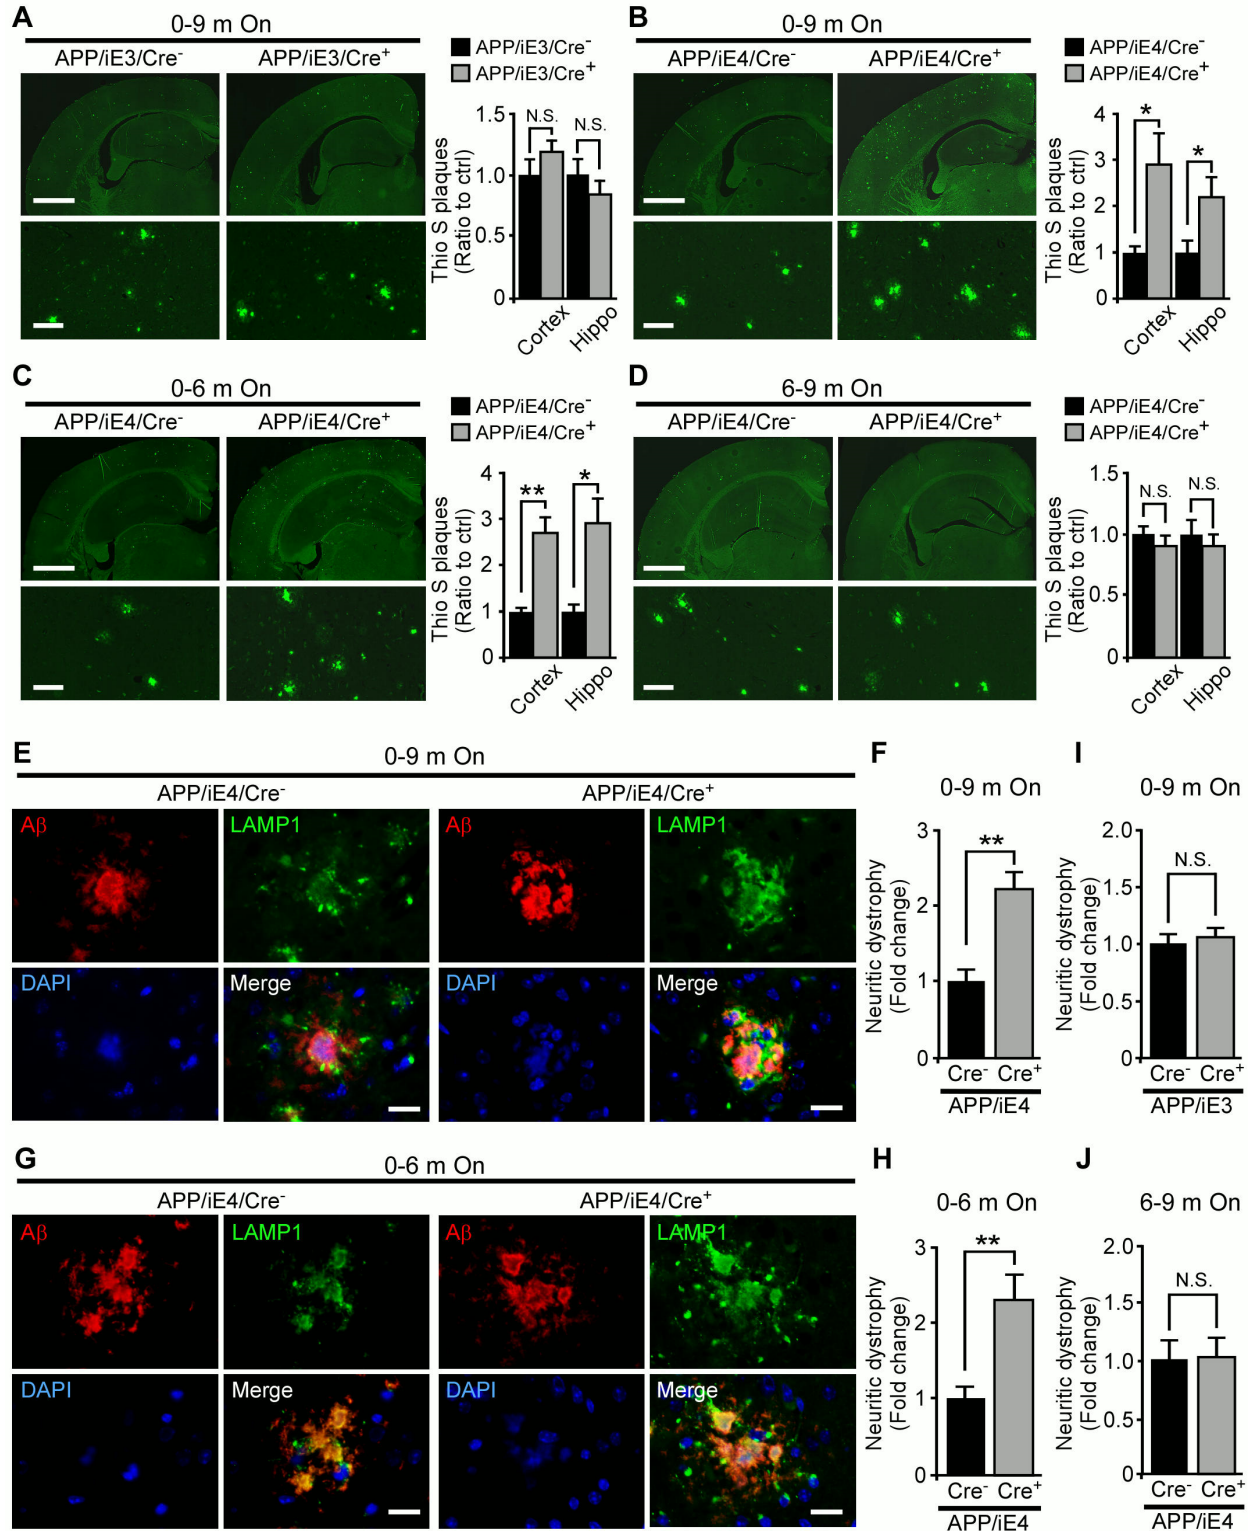

**Figure S3. Overexpression of Astrocytic ApoE4 for the Entire 9 Months and during the Amyloid Seeding Stage Enhances Fibrillar A $\beta$  Deposition and Neuritic Dystrophy. Related to Figure 2.**

(A, B) Brain sections from 9-month-old APP/PS1 mice expressing apoE3 (APP/iE3) or apoE4 (APP/iE4) throughout the entire 9 months (0-9 m On; n=5-8/group) were labeled for fibrillar A $\beta$  using Thioflavin S (Thio S).

(C, D) Brain sections from 9-month-old APP/PS1 mice expressing apoE4 during 0-6 months (0-6 m On; n=4-7/group) or during 6-9 months (6-9 m On; n=7/group) were labeled for fibrillar A $\beta$  using Thio S. Representative images are shown. Scale bar (upper panels), 1 mm; Scale bar (bottom panels), 100  $\mu$ m. The percentage of area covered by Thio S-positive plaques in the cortex and hippocampus of experimental mice was quantified, and was normalized to that of APP/PS1 mice. Values represent mean  $\pm$  SEM. \*, p<0.05; \*\*, p<0.01; N.S., not significant.

(E-J) Brain sections from 9-month-old APP/PS1 mice expressing apoE3 (APP/iE3) or apoE4 (APP/iE4) throughout the entire 9 months (0-9 m On), during seeding stage (0-6 m On) or rapid growing period (6-9 m On) were co-immunostained with A $\beta$  and LAMP1 antibodies to examine plaque-associated neuritic dystrophy. DAPI staining was used for visualization of nuclei. (E, G) Images from mice expressing apoE4 for entire 9 months (0-9 m On) and 0-6 months (0-6 m On) are shown. Scale bar, 20  $\mu$ m.

(F, H, I, J) Quantification of LAMP1 intensity within 15  $\mu$ m of plaque in brain sections of experimental mice expressing astrocytic apoE isoforms (n=6 mice/group; 8 plaques/mouse). Values represent mean  $\pm$  SEM. \*\*, p<0.01; N.S., not significant.

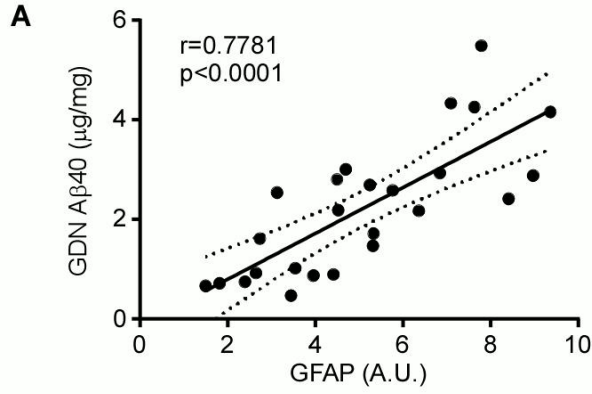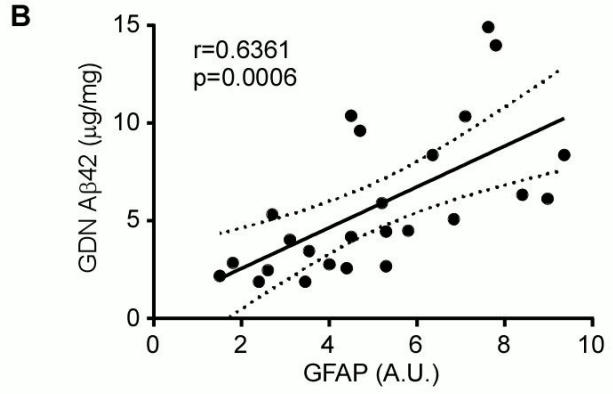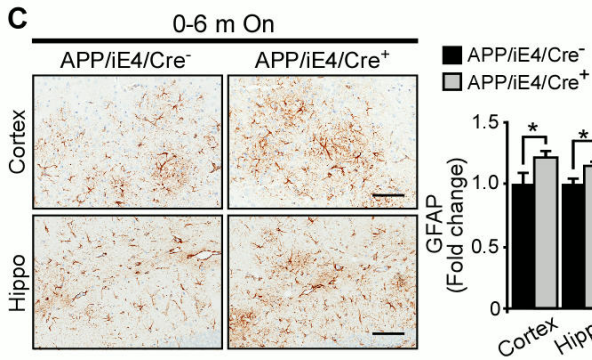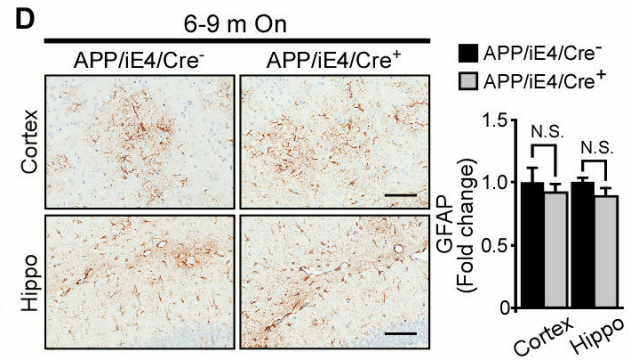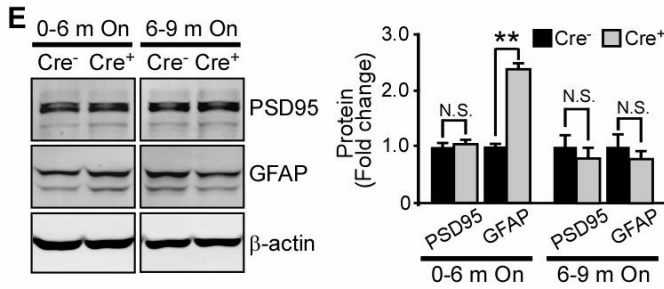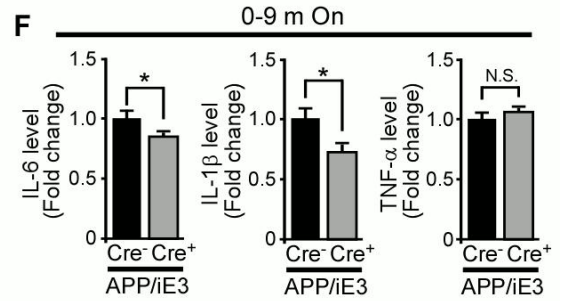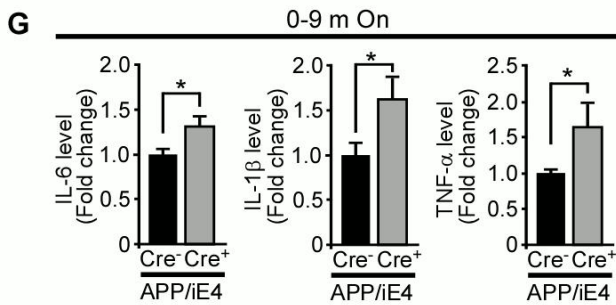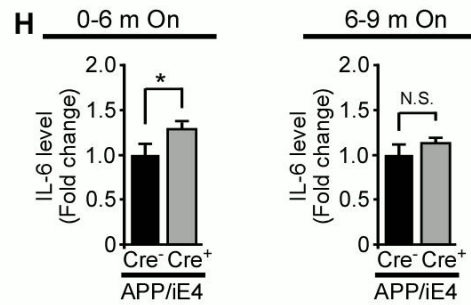

**Figure S4. Astrocytic ApoE4 Expression during the Amyloid Seeding Stage Increases A $\beta$ -associated Neuroinflammation. Related to Figure 4.**

(A, B) The correlation between the levels of insoluble A $\beta$ 40 or A $\beta$ 42 and GFAP in the cortex of 9-month-old APP/PS1 mice expressing apoE4 for the entire 9 months (0-9 m On) was analyzed and plotted. The A $\beta$  levels in the cortex were analyzed by specific A $\beta$  ELISAs, and the GFAP level (Arbitrary Unit) was examined by Western blotting. Correlation coefficient (r) and p-value were acquired by Pearson correlation test. The line of best fit (black line) and 95% confidence intervals (dashed lines) are shown. The levels of GFAP are positively correlated with those of insoluble A $\beta$ 40 and A $\beta$ 42.

(C, D) Brain sections from 9-month-old APP/PS1 mice expressing apoE4 during 0-6 months (0-6 m On; n=5-7 mice/group) or during 6-9 months (6-9 m On; n=7-8 mice/group) were immunostained with GFAP antibody. Representative images of GFAP staining in the cortical and hippocampal regions are shown. Scale bar, 100  $\mu$ m. The immunoreactivity of GFAP staining in cortex and hippocampus was quantified. Data represent mean  $\pm$  SEM. \*, p<0.05; N.S., not significant.

(E) The levels of GFAP and postsynaptic marker PSD-95 in the cortex of 9-month-old APP/PS1 mice expressing apoE4 during 0-6 months (0-6 m On; n=4-6 mice/group) or during 6-9 months (6-9 m On; n=7-9 mice/group) were examined by Western blot and quantified. Data represent mean  $\pm$  SEM. \*\*, p<0.01; N.S., not significant.

(F, G) The levels of pro-inflammatory cytokines IL-6, IL-1 $\beta$ , and TNF- $\alpha$  in the brains of 9-month-old APP/PS1 mice expressing apoE3 or apoE4 for the entire 9 months (0-9 m On) were quantified by ELISAs. Values represent mean  $\pm$  SEM. \*, p<0.05; N.S., not significant.



(H) The levels of IL-6 in the brains of 9-month-old APP/PS1 mice expressing apoE4 during seeding stage (0-6 m On) or rapid growing period (6-9 m On) were quantified by ELISA. Values represent mean  $\pm$  SEM. \*,  $p < 0.05$ ; N.S., not significant.

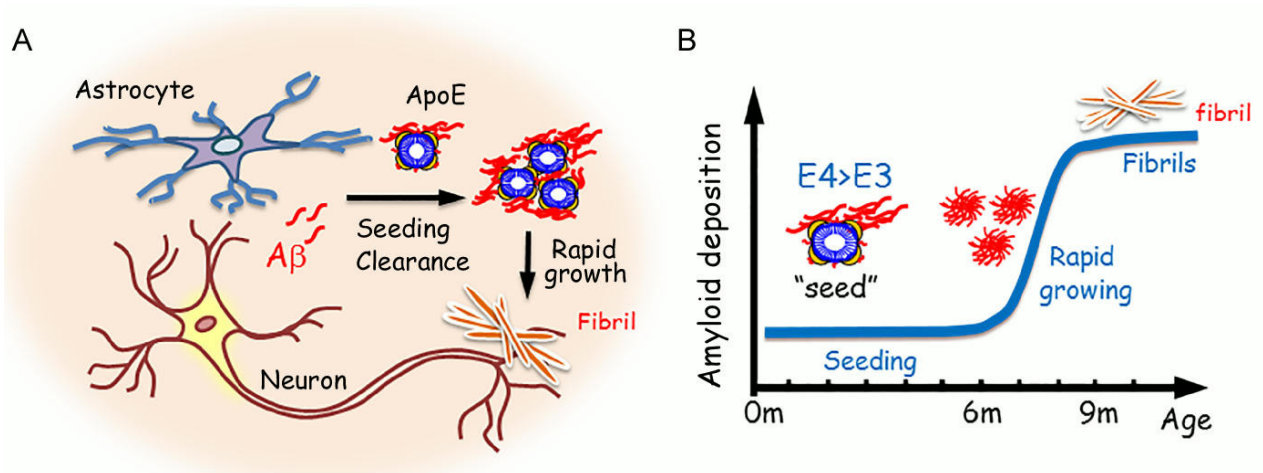

**Figure S5. ApoE4 Accelerates Amyloid Pathology During the Seeding Stage. Related to Figure 1-4.**

(A) Amyloid development and progression consist of two stages: 1) the initial formation of aggregation nuclei during the lag phase, leading to the development of small amount of A $\beta$  aggregates, and 2) the subsequent extension of these A $\beta$  seeds during the rapid growth phase including fibril formation (Burgold et al., 2014). ApoE4 secreted from astrocytes impairs A $\beta$  clearance and accelerates A $\beta$  aggregation in the seeding stage of amyloid development. ApoE itself forms aggregates at different rates depending on the isoform (apoE4 > apoE3 > apoE2) (Hatters et al., 2006). It is possible that apoE4 accelerates A $\beta$  aggregation by co-aggregating with A $\beta$  partially through its self-aggregating propensity.

(B) Schematic diagram of amyloid development and progression at different stages in APP/PS1 mice. Note that apoE4 promotes amyloid seeding during the A $\beta$  nucleation stage (0-6 m), but not during the rapid growing stage (6-9 m), leading to enhanced amyloid deposition.
